# Supplementary material for: Targeted single-cell gene induction by optimizing the dually regulated CRE/loxP system by a newly defined heat-shock promoter and the steroid hormone in Arabidopsis thaliana
Source: Front Plant Sci. 2023 Jun 5;14:1171531. doi: 10.3389/fpls.2023.1171531 (PMC10283073; doi:10.3389/fpls.2023.1171531)
Supplement: Supplementary file 2 [file Table_1.xlsx]

## Sheet: Mutant preparation and cloning
Supplementary Table S1 primers used in this study
Primer	Sequence (5'→3')	Objective
pAt5g59720-cacc-AscI-F1	caccGGCGCGCCATTTGCAGTGTTATGAGTGAATTTTGC	For pHSP18.2 cloning
pAt5g59720-XhoI-R	CTCGAGTGTTCGTTGCTTTTCGGGAGAC
CREGR-cacc-F	caccATGTCCAATTTACTGACCGTACACCAAAATTTG	For CRE-GR cloning
CREGR-R	TCATTTTTGATGAAACAGAAGCTTTTTGATATTTCC
pAt5g59720-cacc-AscI-F1	caccGGCGCGCCATTTGCAGTGTTATGAGTGAATTTTGC	For pHSP18.2v2:CRE-GR cloning
CREGR-R	TCATTTTTGATGAAACAGAAGCTTTTTGATATTTCC
GR-qPCR-L1	ACATGCTGTTTGTCTCCTCTGA	For qPCR analysis of T-DNA insertion number
GR-qPCR-R1	TGGCTCTTCAGACCTTCCTTAG
AT1G71866_L	AGATAAGGCGAGCGGATCAA
AT1G71866_R	CACTTGTAGACGAGAGGGCAAG
